# Supplementary material for: Neonatal genistein exposure disrupts ovarian and uterine development in the mouse by inhibiting cellular proliferation
Source: PubMed Central journal article supplement — J Reprod Dev. 2018 Oct 16;65(1):7–17. doi: 10.1262/jrd.2018-070 (PMC6379766; doi:10.1262/jrd.2018-070), 2018-10-16

**Supplementary Fig. 1.**

Effects of genistein on body weight of mice at PND 10 following 100 mg/kg genistein exposure.

(\* $p < 0.05$ ,  $n = 6$ , vs control).

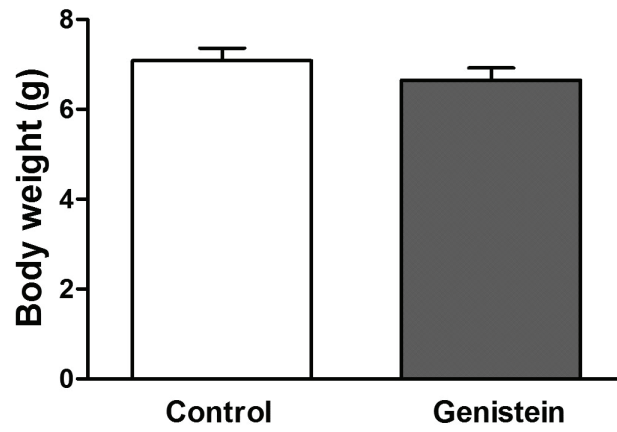

Supplement: jrd-65-007-s001.pdf [file jrd-65-007-s001.pdf]
